# Supplementary material
Source: PubMed Central journal article supplement (PMC129745)

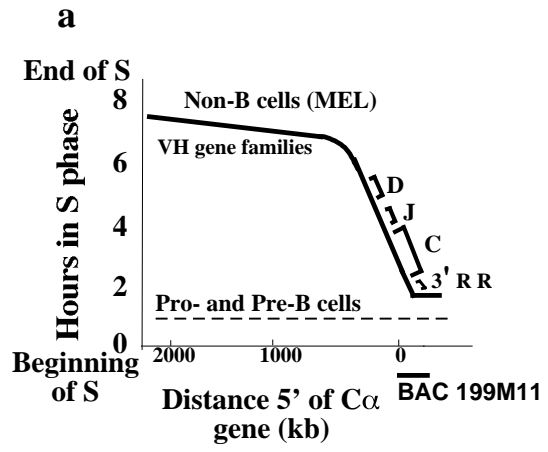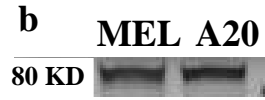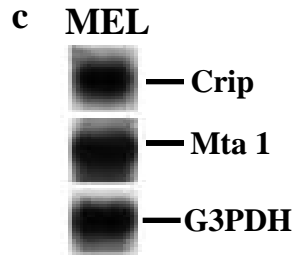

a

Supplement: pnas_212392399_4.pdf [file pnas_212392399_4.pdf]

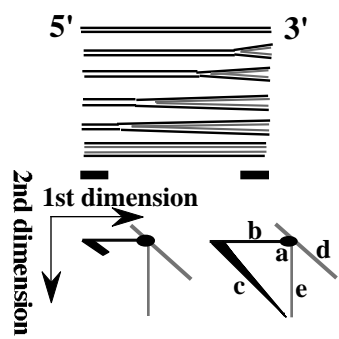

Supplement: pnas_212392399_5.pdf [file pnas_212392399_5.pdf]
